# Supplementary material for: “What Is a Step?” Differences in How a Step Is Detected among Three Popular Activity Monitors That Have Impacted Physical Activity Research
Source: MDPI journal article supplement (doi:10.3390/s18041206), 2018-04-15
Supplement: s1 [file s1]

|              | 0.89 m/s    | 0.98 m/s    | 1.07 m/s    | 1.16 m/s    | 1.25 m/s    | 1.34 m/s    | 1.43        | 1.52 m/s    | 1.61 m/s    | 1.7 m/s     | 1.79 m/s    |
|--------------|-------------|-------------|-------------|-------------|-------------|-------------|-------------|-------------|-------------|-------------|-------------|
|              | (2mph)      | (2.2mph)    | (2.4mph)    | (2.6mph)    | (2.8mph)    | (3mph)      | (3.2mph)    | (3.4mph)    | (3.6mph)    | (3.8mph)    | (4mph)      |
| <b>Hip</b>   | 2.75 (1.38) | 2.48 (1.66) | 2.86 (1.94) | 2.30 (1.59) | 2.27 (1.65) | 2.90 (1.38) | 3.01 (1.83) | 3.0 (1.61)  | 3.38 (2.1)  | 3.54 (1.70) | 3.57 (1.40) |
| <b>Wrist</b> | 1.71 (0.67) | 1.56 (0.76) | 1.23 (0.41) | 1.24 (0.47) | 1.45 (0.85) | 1.63 (1.09) | 1.37 (0.88) | 1.38 (0.89) | 1.50 (0.88) | 1.41 (0.65) | 1.68 (1.06) |

**Supplementary table 1.** Mean  $\pm$  SD of the second dominant frequencies (Hz) detected in the acceleration signal during the walking protocol.
